# Supplementary material for: One-dimensional hybrid nanocomposite of high-density monodispersed Fe3O4 nanoparticles and carbon nanotubes for high-capacity storage of lithium and sodium
Source: Royal Society of Chemistry journal article supplement (doi:10.1039/c6ta07452a), 2016-01-01
Supplement: c6ta07452a1.pdf [file c6ta07452a1.pdf]

### Supplementary Information

#### **One-Dimensional High-Density Monodispersed Fe<sub>3</sub>O<sub>4</sub> Nanoparticles@Carbon**

#### **Nanotubes Hybrid Nanocomposite for Highly Lithium and Sodium Storage**

Xiujuan Wang<sup>a</sup>, Xiaojie Liu<sup>a</sup>, Gang Wang<sup>b</sup>, Yuan Xia<sup>a</sup>, Hui Wang<sup>a\*</sup>

*<sup>a</sup>Key Laboratory of Synthetic and Natural Functional Molecule Chemistry (Ministry of Education), College of Chemistry & Materials Science, Northwest University, Xi'an 710069, PR China*

*<sup>b</sup>National Key Laboratory of Photoelectric Technology and Functional Materials (Culture Base), National Photoelectric Technology and Functional Materials & Application International Cooperation Base, Institute of Photonics & Photon-Technology, Northwest University, Xi'an 710069, PR China*

\*Corresponding author:

Tel.: +86 029 88363115

Fax: +86 29 88302571

E-mail address: [huiwang@nwu.edu.cn](mailto:huiwang@nwu.edu.cn) (H. Wang).

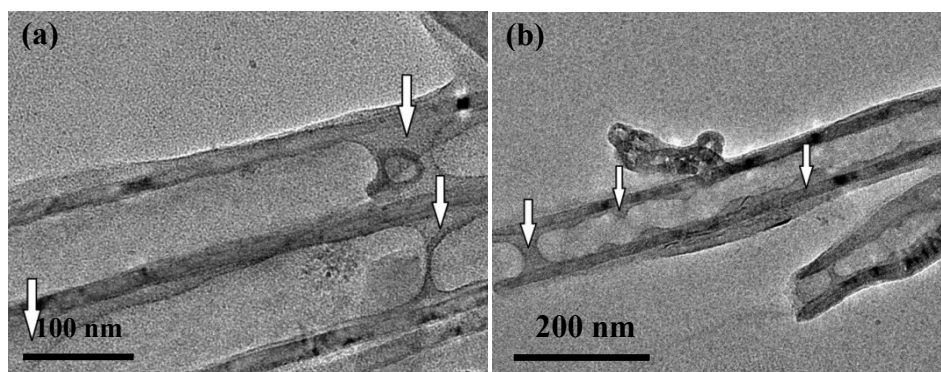

**Fig. S1** The TEM images after iron stearate octadecene solution filling CNTs cavity (a) and before being heated up for decomposition (b).

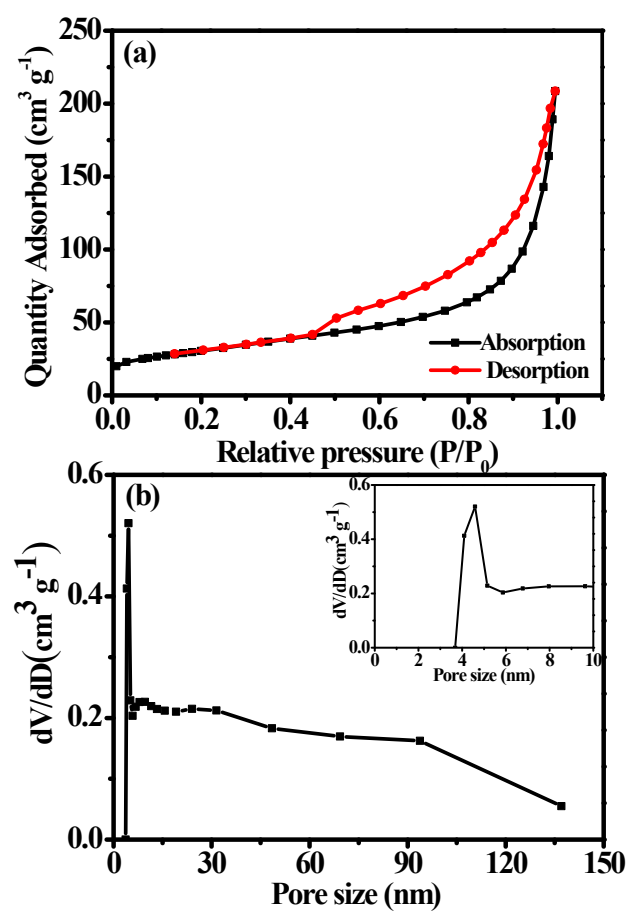

**Fig. S2** (a) N<sub>2</sub> sorption isotherms and (b) pore size distribution of CNTs

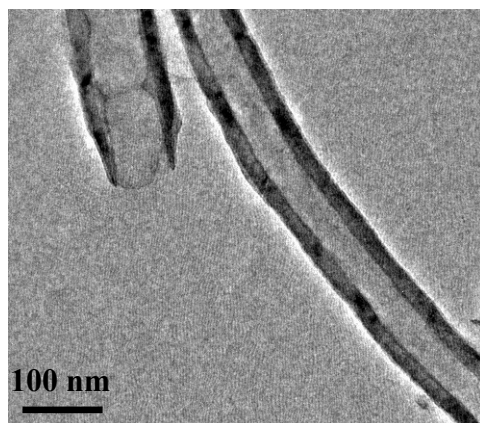

**Fig. S3** Representative TEM image of the CNTs with a straight and open-ended channel.

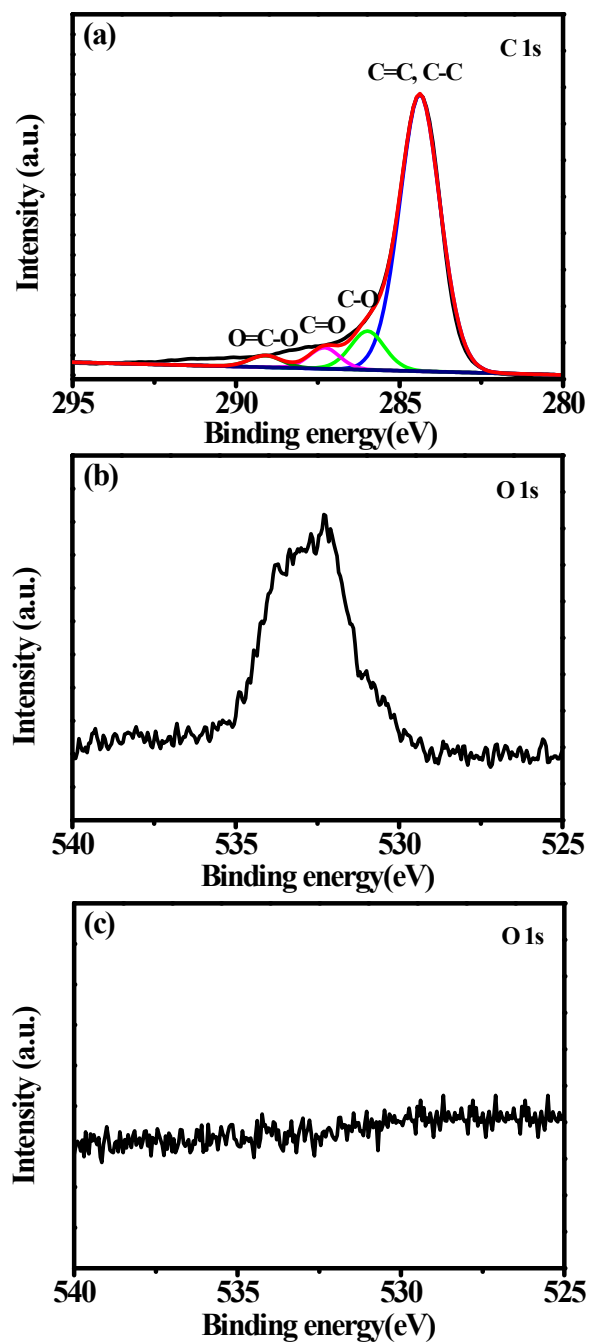

**Fig. S4** High-resolution XPS spectra of (a) C1s and (b) O1s of CNTs. (c) Characteristic O 1s spectra of CNT after annealing at 800 °C.

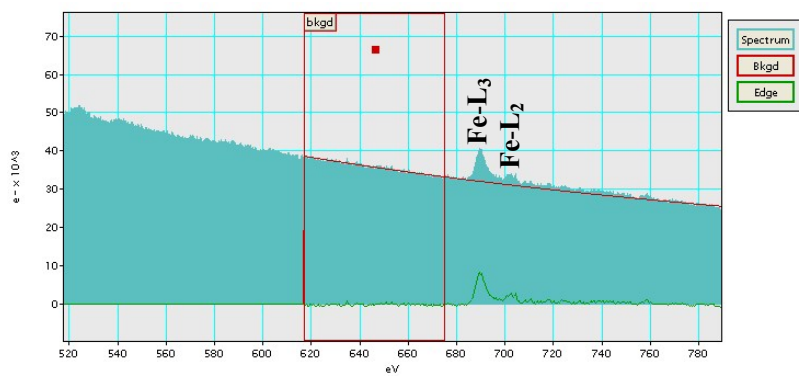

**Fig. S5** EELS spectrum of Fe<sub>3</sub>O<sub>4</sub>@CNT

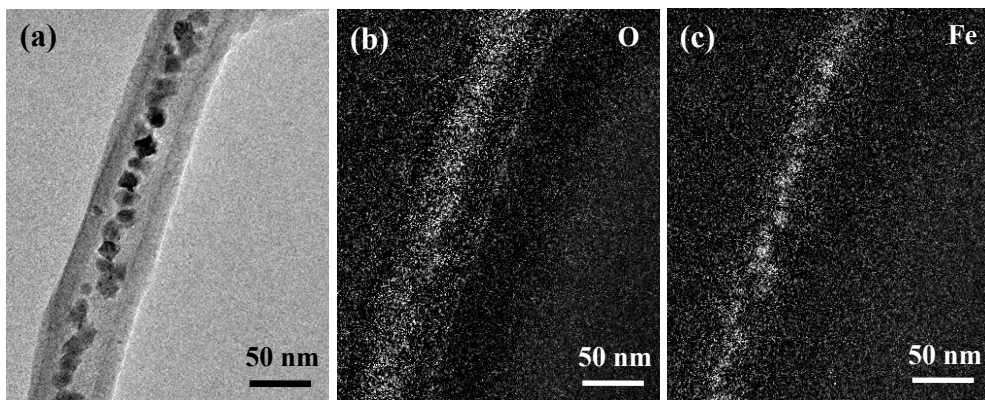

**Fig. S6** TEM image of Fe<sub>3</sub>O<sub>4</sub>@CNT nanocomposite and corresponding element mappings of (b) O, (c) Fe

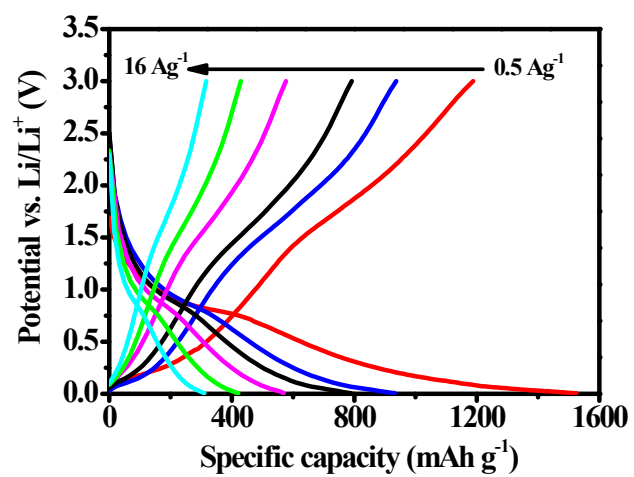

**Fig. S7** Voltage profiles of the  $\text{Fe}_3\text{O}_4@\text{CNT}$  nanocomposite at different rates



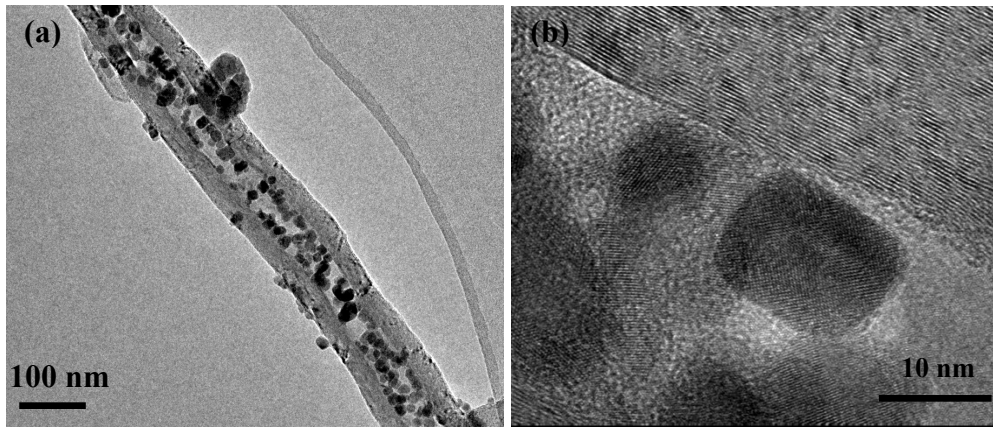

**Fig. S8** TEM images of Fe<sub>3</sub>O<sub>4</sub>@CNT nanocomposite after 200th cycle at the current density of 1 A g<sup>-1</sup>.

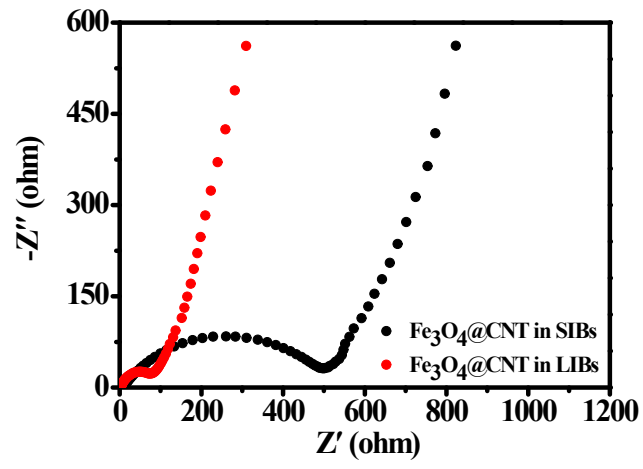

**Fig. S9** The Nyquist plots of Fe<sub>3</sub>O<sub>4</sub>@CNT electrode in LIBs and SIBs

**Table S1** Specific capacities of Fe<sub>3</sub>O<sub>4</sub>/CNT mixture, Fe<sub>3</sub>O<sub>4</sub> nanoparticles, and CNTs  
at different current densities

| Current density (A g <sup>-1</sup> ) | Fe <sub>3</sub> O <sub>4</sub> /CNT (mAh g <sup>-1</sup> ) | Fe <sub>3</sub> O <sub>4</sub> (mAh g <sup>-1</sup> ) | CNTs (mAh g <sup>-1</sup> ) |
|--------------------------------------|------------------------------------------------------------|-------------------------------------------------------|-----------------------------|
| 0.5                                  | 660(10th)                                                  | 578(10th)                                             | 270(10th)                   |
| 1                                    | 530(20th)                                                  | 368(20th)                                             | 187(20th)                   |
| 2                                    | 426(30th)                                                  | 248(30th)                                             | 132(30th)                   |
| 4                                    | 285(40th)                                                  | 166(40th)                                             | 101(40th)                   |
| 8                                    | 189(50th)                                                  | 91(50th)                                              | 74(50th)                    |
| 16                                   | 142(60th)                                                  | 60(60th)                                              | 56(60th)                    |

**Table S2** Lithium storage performance comparison of specific capacities of the Fe<sub>3</sub>O<sub>4</sub>@CNT nanocomposite with other Fe<sub>3</sub>O<sub>4</sub>-based materials reported in the literatures.

| Fe <sub>3</sub> O <sub>4</sub> -based materials                            | Capacity (mAh g <sup>-1</sup> ) at different Current density                                                                      | Ref.      |
|----------------------------------------------------------------------------|-----------------------------------------------------------------------------------------------------------------------------------|-----------|
| Fe <sub>3</sub> O <sub>4</sub> @CNT nanocomposite                          | ~923(100 cycles) at 0.5 A g <sup>-1</sup><br>~720( 200 cycles) at 1 A g <sup>-1</sup><br>~615( 200 cycles) at 2 A g <sup>-1</sup> | This work |
| Hollow nitrogen (N)-doped Fe <sub>3</sub> O <sub>4</sub> /carbon nanocages | ~700 (100 cycles) at 0.2 A g <sup>-1</sup>                                                                                        | [51]      |
| Graphene-Fe <sub>3</sub> O <sub>4</sub> @Carbon Nanocomposites             | ~710(50 cycles) at 0.1 A g <sup>-1</sup>                                                                                          | [28]      |
| Porous Fe <sub>3</sub> O <sub>4</sub> /C Microbelts                        | ~710(50 cycles) at 0.1 A g <sup>-1</sup>                                                                                          | [52]      |
| Fe <sub>3</sub> O <sub>4</sub> /C Nanotubes                                | ~600(100 cycles) at 0.15 C                                                                                                        | [37]      |
| Fe <sub>3</sub> O <sub>4</sub> @C Microcapsules                            | ~600(50 cycles) at 0.928 A g <sup>-1</sup>                                                                                        | [12]      |
|                                                                            | 1                                                                                                                                 |           |
| Graphene-Encapsulated Hollow Fe <sub>3</sub> O <sub>4</sub> Nanoparticle   | ~900 (50 cycles) at 0.1 A g <sup>-1</sup>                                                                                         | [10]      |
| Fe <sub>3</sub> O <sub>4</sub> /Fe/carbon                                  | ~600 (40 cycles) at 0.05 A g <sup>-1</sup>                                                                                        | [53]      |
| Fe <sub>3</sub> O <sub>4</sub> -graphene                                   | ~539 (200 cycles) at 1 A g <sup>-1</sup>                                                                                          | [54]      |
| Fe <sub>3</sub> O <sub>4</sub> -GNS                                        | ~650 (100 cycles) at 0.1 A g <sup>-1</sup>                                                                                        | [55]      |
| Fe <sub>3</sub> O <sub>4</sub> -graphene                                   | ~410 (75 cycles) at 1 A g <sup>-1</sup>                                                                                           | [56]      |
| Fe <sub>3</sub> O <sub>4</sub> @C@PGC                                      | ~792 (350 cycles) at 5 A g <sup>-1</sup>                                                                                          | [13]      |
| Carbon-coated Fe <sub>3</sub> O <sub>4</sub> nanotube                      | ~840 (300 cycles) at 1 A g <sup>-1</sup>                                                                                          | [59]      |

**Table S3** Comparison of specific capacities of the Fe<sub>3</sub>O<sub>4</sub>@CNT nanocomposite with

| Fe <sub>3</sub> O <sub>4</sub> -based materials           | Capacity (mAh g <sup>-1</sup> ) at different Current density | Ref.      |
|-----------------------------------------------------------|--------------------------------------------------------------|-----------|
| Fe <sub>3</sub> O <sub>4</sub> @CNT nanocomposite         | ~ 377(300 cycles) at 0.1 A g <sup>-1</sup>                   | This work |
| C/Fe <sub>3</sub> O <sub>4</sub> /CNTs                    | ~320 (50 cycles) at 0.05A g <sup>-1</sup>                    | [50]      |
| RGO/Fe <sub>3</sub> O <sub>4</sub>                        | ~204(200 cycles) at 0.04 A g <sup>-1</sup>                   | [57]      |
| Fe <sub>3</sub> O <sub>4</sub> nanoparticles              | ~160(30 cycles) at 0.02 A g <sup>-1</sup>                    | [58]      |
| Fe <sub>3</sub> O <sub>4</sub> materials                  | ~250(10 cycles) at 0.055A g <sup>-1</sup>                    | [49]      |
| Fe <sub>3</sub> O <sub>4</sub> nanoparticles/graphene     | ~213(260 cycles) at 0.1A g <sup>-1</sup>                     | [48]      |
| Fe <sub>3</sub> O <sub>4</sub> QD@C-GN                    | ~343(1000 cycles) at 2A g <sup>-1</sup>                      | [60]      |
| Porous carbon-encapsulated Fe <sub>3</sub> O <sub>4</sub> | ~450 (100 cycles) at 0.2A g <sup>-1</sup>                    | [61]      |

other Fe<sub>3</sub>O<sub>4</sub>-based materials as anodes for SIBs.

[51] L. Wang, J. F. Wu, Y. Q. Chen, X. H. Wang, R. H. Zhou, S. H. Chen, Q. H. Guo, H. Q. Hou and Y. H. Song, *Electrochimica Acta*, 2015, 186, 50.

[52] L. M. Lang and Z. Xu, *ACS Appl. Mater. Interfaces*, 2013, 5, 1698.

[53] X. Y. Zhao, D. G. Xia and K. Zheng, *ACS Appl. Mater. Interfaces*, 2012, 4, 1350.

[54] Y. Dong, R. Ma, M. Hu, H. Cheng, Q. Yang, Y. Y. Li and J. A. Zapien, *Phys. Chem. Chem. Phys.*, 2013, 15, 7174.

[55] J. Z. Wang, C. Zhong, D. Wexler, N. H. Idris, Z. X. Wang, L. Q. Chen and H. K.

Liu, *Chem. Eur. J.*, 2011, 17, 661.

[56] P. C. Lian, X. F. Zhu, H. F. Xiang, Z. Li, W. S. Yang and H. H. Wang, *Electrochim. Acta*, 2010, 56, 834.

[57] S. H. Zhang, W. J. Li, B. Tan, S. L. Chou, Z. Li and S. X. Dou, *J. Mater. Chem. A*, 2015, 3, 4793.

[58] S. Komaba, T. Mikumo, N. Yabuuchi, A. Ogata, H. Yoshida and Y. Yamada, *J. Electrochem. Soc.*, 2009, 157, A60.

[59] F. Han, L. J. Ma, Q. Sun, C. Lei and A. H. Lu, *Nano Research*, 2014, 7, 1706.

[60] L. Y. Qi, Y. W. Zhang, Z. C. Zuo, Y. L. Xin, C. K. Yang, B. Wu, X. X. Zhang and H. H. Zhou, *J. Mater. Chem. A*, 2016, 4, 8822.

[61] Y. P. Zhou, W. P. Sun, X. H. Rui, Y. Zhou, W. J. Ng, Q. Y. Yan and E. Fong, *Nano Energy*, 2016, 21, 71.
